# Supplementary figures and images for: Regulatory Effects of FGF9 on Dermal Papilla Cell Proliferation in Small-Tailed Han Sheep
Source: MDPI journal article supplement (doi:10.3390/genes14051106), 2023-05-18

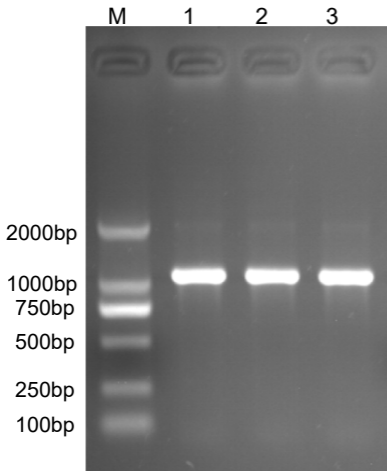

M: DL2000 marker; 1: skin tissue; 2: hair follicles; 3: DPC.

Figure 1. RT PCR results of FGF9 gene in sheep skin tissue

Supplement: s1 [file s1]
